# Supplementary material
Source: Springer Nature journal article supplement (https://www.springermedizin.de/resource/supplementary/13256_2009_1295_MOESM5_ESM.pdf/9647434)

# Rash Grade (CTCAE.V3))

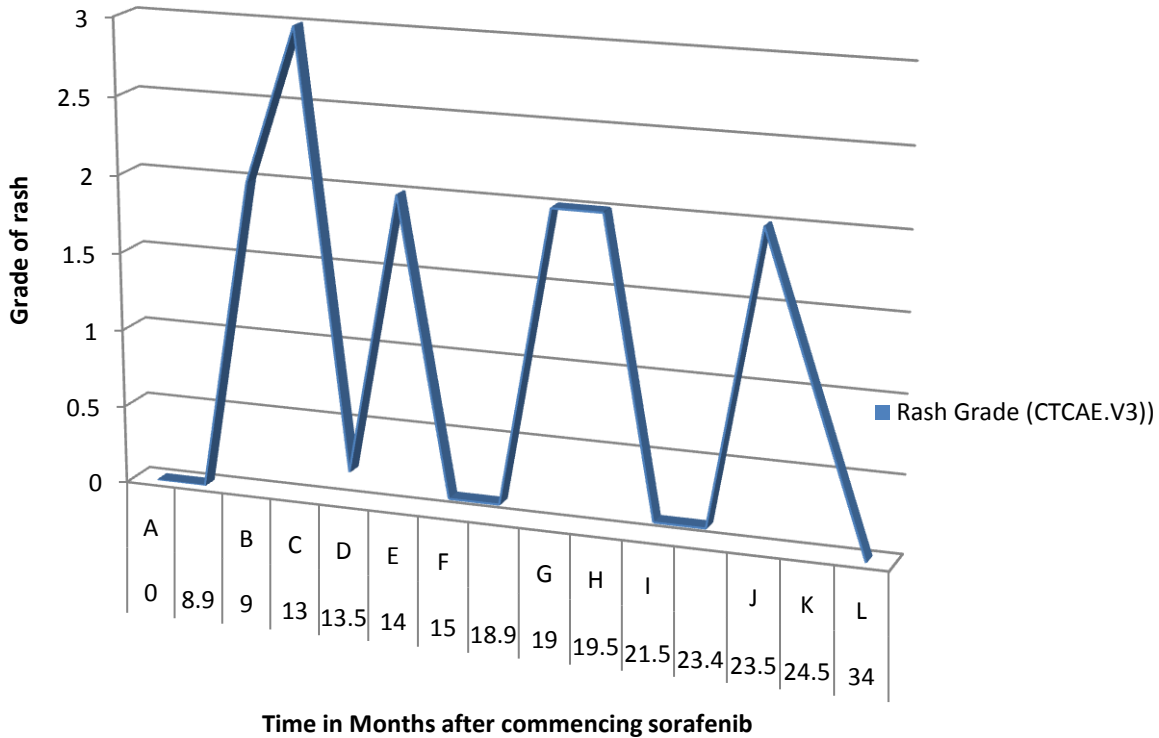

Supplement: MOESM5 [file 9647434]
